# Supplementary material for: Network-Based Biomarkers for Cold Coagulation Blood Stasis Syndrome and the Therapeutic Effects of Shaofu Zhuyu Decoction in Rats
Source: Hindawi journal article supplement (doi:10.1155/2013/901943), 2013-01-01
Supplement: f1 [file 901943.f1.pdf]

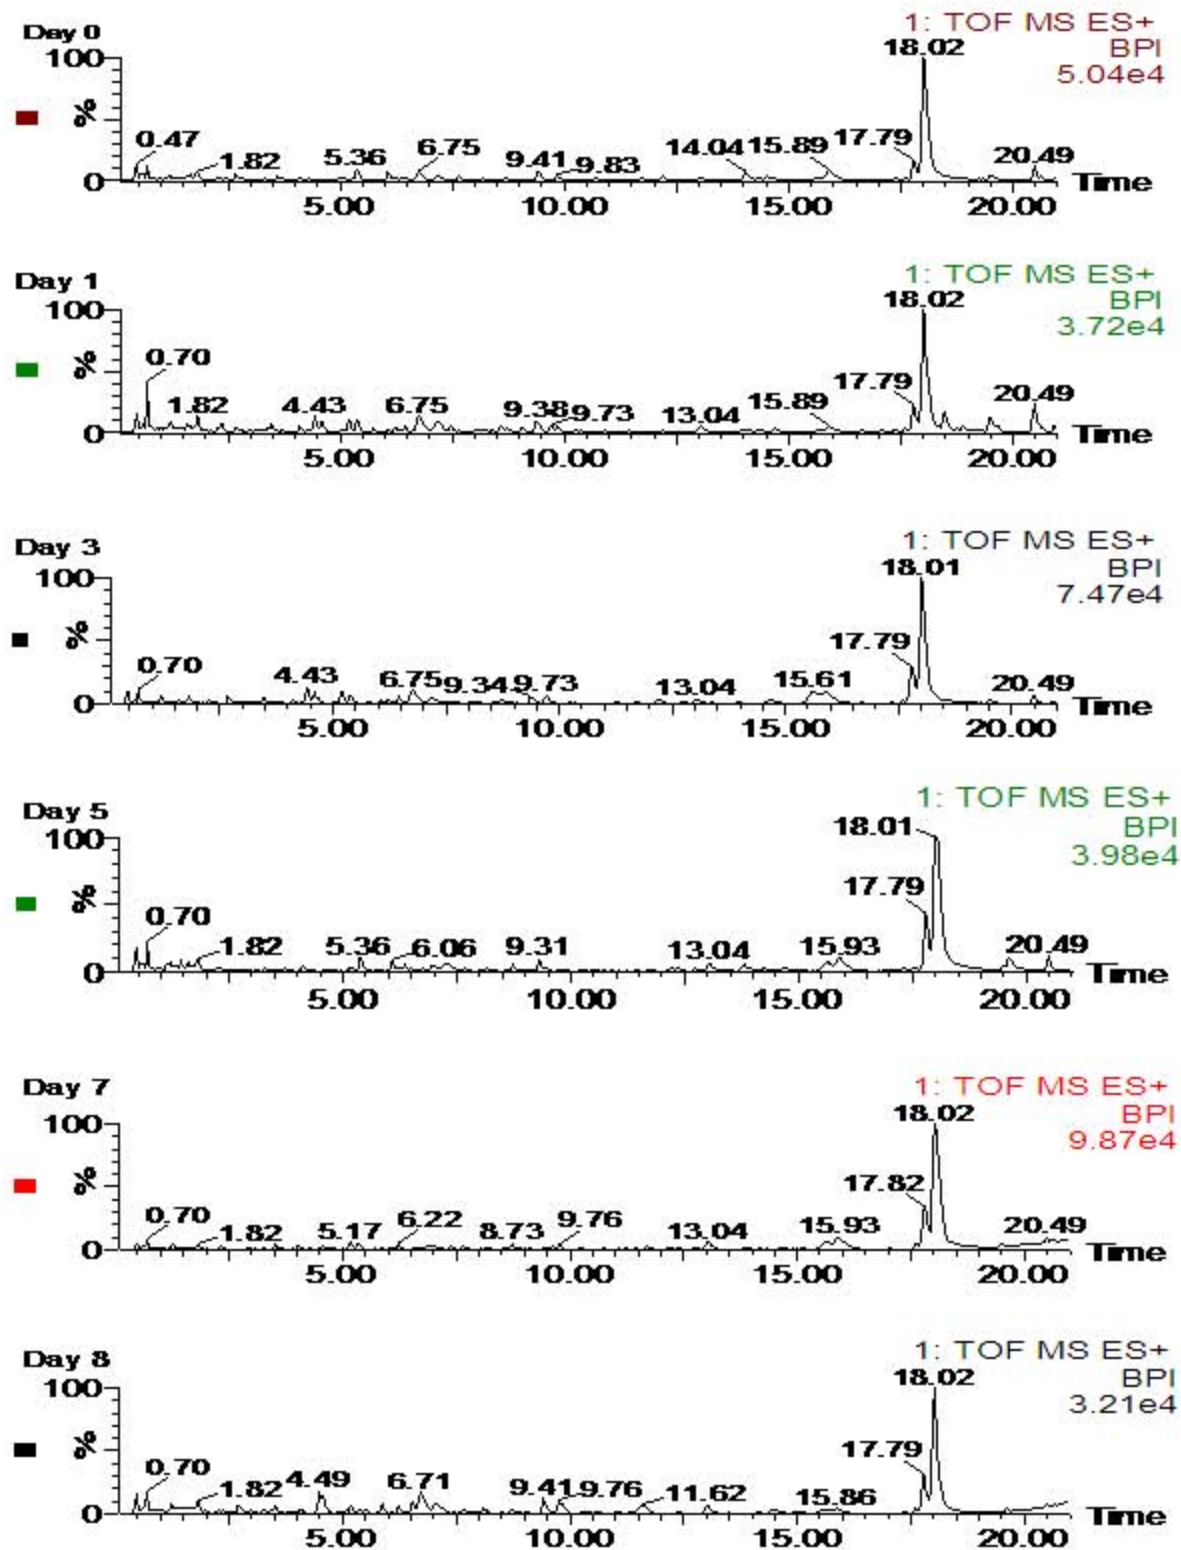

**Fig. S1**

Scores Comp[1] vs. Comp[2] colored by Sample Group

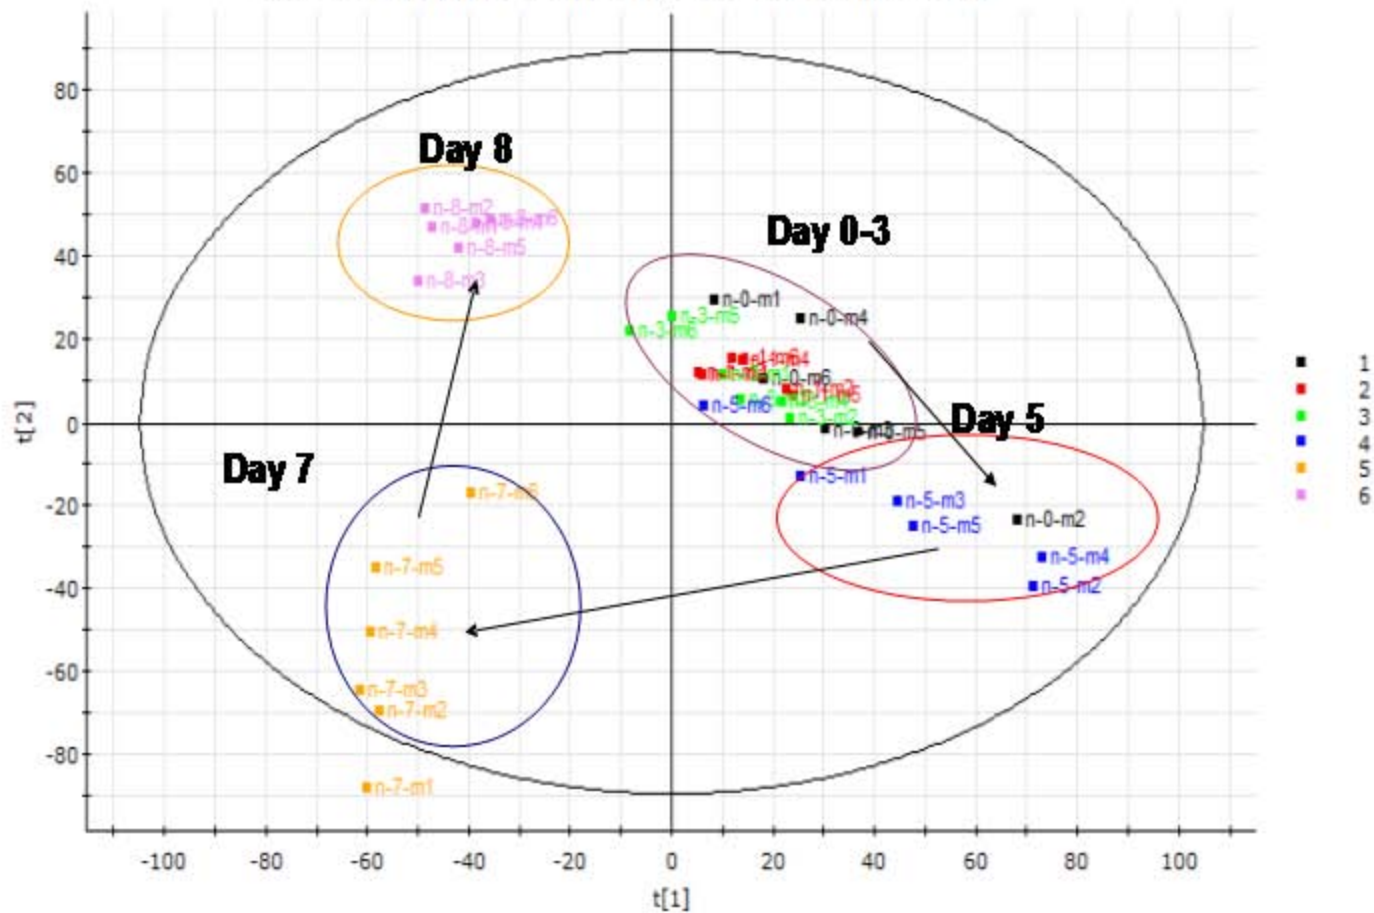

**Fig. S2**

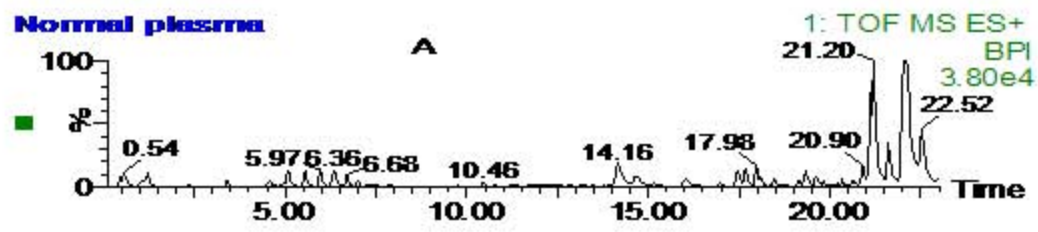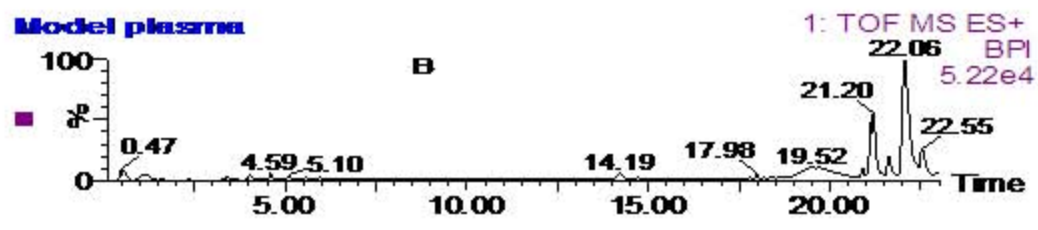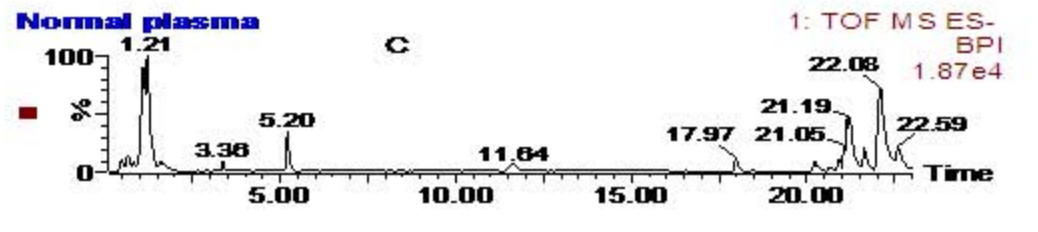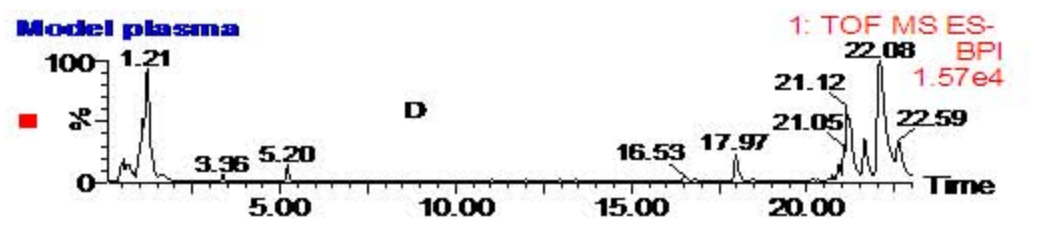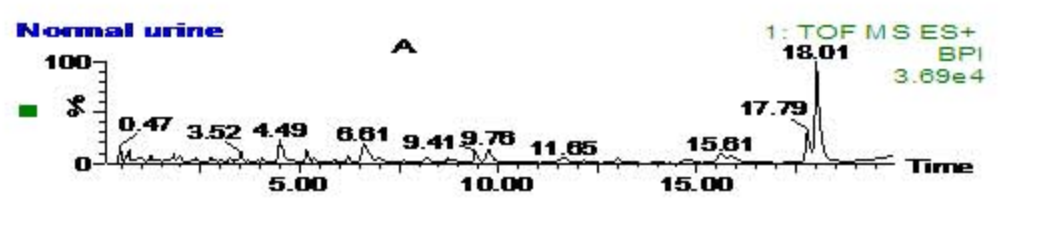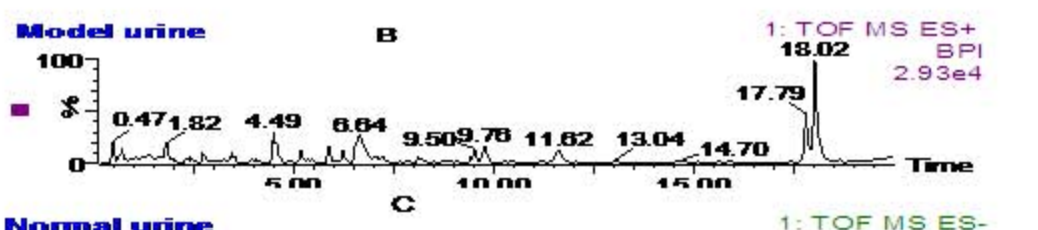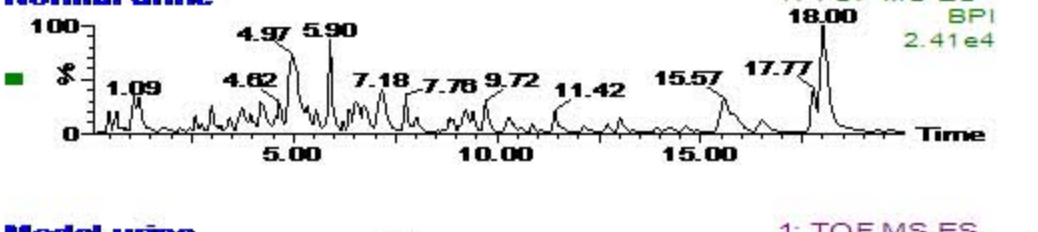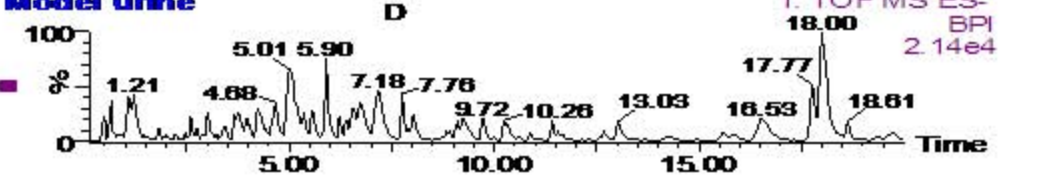

**Fig. S3**

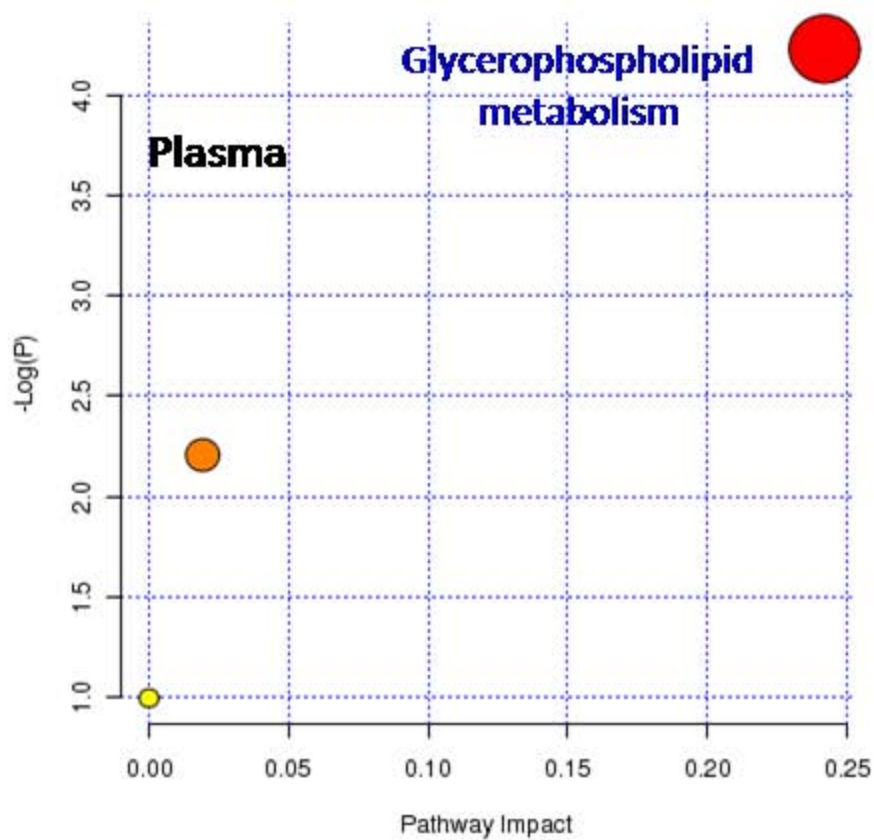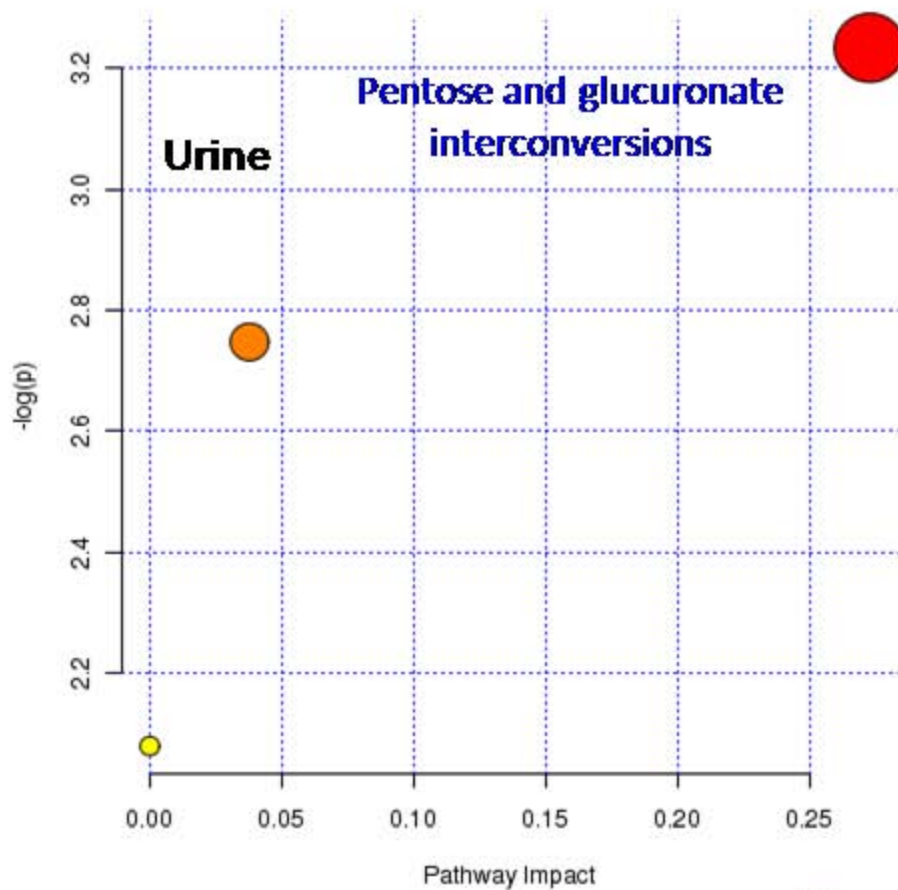

**Fig. S4**
